# Supplementary material
Source: PubMed Central journal article supplement (PMC6058232)
Supplement: ba019620-suppl1.pdf [file ba019620-suppl1.pdf]

**Supplementary Table S1.** TCE group assignment of 100 DPB1 alleles.

| <b>DPB1*<sup>a</sup></b> | <b>CWD<sup>b</sup></b> | <b>TCE-X<sup>c</sup></b> | <b>TCE-FD<sup>d</sup></b> |
|--------------------------|------------------------|--------------------------|---------------------------|
| 01:01                    | Yes                    | 3                        | 3                         |
| 02:01                    | Yes                    | 3                        | 3                         |
| 02:02                    | Yes                    | 3                        | 3                         |
| 03:01                    | Yes                    | 2                        | 2                         |
| 04:01                    | Yes                    | 3                        | 3                         |
| 04:02                    | Yes                    | 3                        | 3                         |
| 05:01                    | Yes                    | 3                        | 3                         |
| 06:01 <sup>e</sup>       | Yes                    | 3                        | 2                         |
| 08:01                    | Yes                    | 3                        | 3                         |
| 09:01                    | Yes                    | 1                        | 1                         |
| 10:01                    | Yes                    | 1                        | 1                         |
| 11:01                    | Yes                    | 3                        | 3                         |
| 13:01                    | Yes                    | 3                        | 3                         |
| 14:01                    | Yes                    | 2                        | 2                         |
| 15:01                    | Yes                    | 3                        | 3                         |
| 16:01                    | Yes                    | 3                        | 3                         |
| 17:01                    | Yes                    | 1                        | 1                         |
| 18:01 <sup>f</sup>       | Yes                    |                          | 3                         |
| 19:01 <sup>e</sup>       | Yes                    | 3                        | 2                         |
| 20:01                    | Yes                    | 3                        | 3                         |
| 21:01 <sup>f</sup>       | Yes                    |                          | 2                         |
| 22:01                    | Yes                    | 3                        | 3                         |
| 23:01                    | Yes                    | 3                        | 3                         |
| 24:01                    | Yes                    | 3                        | 3                         |
| 25:01                    | Yes                    |                          | 2                         |
| 26:01 <sup>f</sup>       | Yes                    |                          | 3                         |
| 27:01 <sup>f</sup>       | Yes                    |                          | 3                         |
| 28:01                    | Yes                    | 3                        | 3                         |
| 29:01 <sup>f</sup>       | Yes                    |                          | 2                         |
| 30:01 <sup>f</sup>       | Yes                    |                          | 1                         |
| 31:01                    | Yes                    | 3                        | 3                         |
| 32:01                    | Yes                    | 3                        | 3                         |
| 33:01                    | Yes                    | 3                        | 3                         |
| 34:01                    | Yes                    | 3                        | 3                         |
| 35:01 <sup>f</sup>       | Yes                    |                          | 2                         |
| 38:01                    |                        | 3                        | 3                         |
| 39:01                    | Yes                    | 3                        | 3                         |
| 40:01                    | Yes                    | 3                        | 3                         |
| 41:01                    | Yes                    | 3                        | 3                         |
| 45:01                    | Yes                    | 2                        | 2                         |
| 46:01                    | Yes                    | 3                        | 3                         |
| 47:01                    | Yes                    | 3                        | 3                         |
| 48:01                    | Yes                    | 3                        | 3                         |
| 49:01                    |                        | 3                        | 3                         |
| 50:01                    | Yes                    |                          | 3                         |
| 51:01                    | Yes                    | 3                        | 3                         |

**Supplementary Table S1 (cont).**

| <b>DPB1*<sup>a</sup></b> | <b>CWD<sup>b</sup></b> | <b>TCE-X<sup>c</sup></b> | <b>TCE-FD<sup>d</sup></b> |
|--------------------------|------------------------|--------------------------|---------------------------|
| 53:01                    |                        | 3                        | 3                         |
| 55:01                    | Yes                    |                          | 2                         |
| 57:01                    |                        | 3                        | 3                         |
| 59:01                    | Yes                    | 3                        | 3                         |
| 60:01                    |                        | 3                        | 3                         |
| 62:01                    |                        | 3                        | 3                         |
| 63:01                    | Yes                    | 3                        | 3                         |
| 65:01                    | Yes                    | 3                        | 3                         |
| 66:01                    | Yes                    |                          | 3                         |
| 67:01                    | Yes                    |                          | 2                         |
| 68:01                    | Yes                    | 3                        | 3                         |
| 71:01                    | Yes                    | 3                        | 3                         |
| 72:01                    | Yes                    | 3                        | 3                         |
| 73:01                    |                        | 3                        | 3                         |
| 75:01                    | Yes                    | 3                        | 3                         |
| 76:01                    | Yes                    |                          | 2                         |
| 77:01                    | Yes                    | 3                        | 3                         |
| 78:01                    | Yes                    |                          | 2                         |
| 79:01                    | Yes                    |                          | 2                         |
| 80:01                    | Yes                    | 3                        | 3                         |
| 81:01                    | Yes                    | 3                        | 3                         |
| 82:01                    | Yes                    | 3                        | 3                         |
| 83:01                    | Yes                    | 3                        | 3                         |
| 84:01                    |                        | 3                        | 3                         |
| 85:01 <sup>f</sup>       | Yes                    |                          | 3                         |
| 86:01                    |                        | 2                        | 2                         |
| 94:01                    |                        | 3                        | 3                         |
| 95:01                    |                        | 3                        | 3                         |
| 96:01                    |                        | 3                        | 3                         |
| 97:01                    |                        | 3                        | 3                         |
| 99:01                    |                        | 3                        | 3                         |
| 100:01                   |                        | 3                        | 3                         |
| 101:01                   |                        | 3                        | 3                         |
| 102:01                   |                        | 3                        | 3                         |
| 103:01                   |                        | 3                        | 3                         |
| 104:01                   |                        | 2                        | 2                         |
| 105:01                   | Yes                    | 3                        | 3                         |
| 106:01                   | Yes                    | 3                        | 2                         |
| 107:01                   | Yes                    |                          | 3                         |
| 108:01                   | Yes                    | 3                        | 3                         |
| 109:01                   | Yes                    |                          | 3                         |
| 112:01                   |                        | 3                        | 3                         |
| 113:01                   | Yes                    |                          | 2                         |
| 115:01                   | Yes                    | 3                        | 3                         |
| 116:01                   | Yes                    | 3                        | 3                         |
| 121:01                   | Yes                    |                          | 3                         |

### Supplementary Table S1 (cont).

| DPB1*               | CWD | TCE-X | TCE-FD |
|---------------------|-----|-------|--------|
| 122:01              | Yes |       | 3      |
| 123:01              | Yes |       | 3      |
| 124:01              | Yes |       | 3      |
| 126:01              | Yes |       | 3      |
| 127:01              | Yes |       | 3      |
| 128:01              | Yes |       | 3      |
| 129:01              | Yes |       | 3      |
| 130:01 <sup>f</sup> | Yes |       | 3      |

<sup>a</sup>listed are 100 DPB1 alleles covering those reported as common/well documented (CWD) in the EFI or ASHI catalogue<sup>1,2</sup> and analyzed for alloreactive T-cell cross-reactivity underlying the TCE-X classification (N=52), those reported as CWD but not tested by TCE-X (N=28), and those tested by TCE-X but not reported as CWD (N=20).

<sup>b</sup>“Yes” indicates that the DPB1 allele was reported as CWD in the EFI or ASHI catalogue (Sanchez-Mazas, Mack) (N=80); blank indicates that the DPB1 allele was not reported as CWD in these catalogues (N=20).

<sup>c</sup>TCE group as assigned by the TCE-X model (N=72); blank indicates that the DPB1 allele could not be assigned by TCE-X because it was not experimentally tested by alloreactive T-cell effectors (N=28).

<sup>d</sup>TCE group as assigned by the TCE-FD model. Note the absence of blanks since all DPB1 alleles can be assigned by TCE-FD (N=100).

<sup>e</sup>Different TCE assignment by TCE-X (TCE group 3) and TCE-FD (TCE group 2). Analysis of cross-reactivity by additional T-cell effectors alloreactive to DPB1\*09:01 confirmed TCE group 2 assignment as in TCE-FD (Crivello).

<sup>f</sup>DPB1 allele amongst a total of nine alleles that could not be assigned by TCE-X but were found at least once in 33/2730 donor-recipient pairs analyzed in this study.

**Supplementary Table S2.** Multivariable outcome associations for 210 pairs assigned discordantly by TCE-X and TCE-FD.

|                     | <b>HR</b> | <b>p-value</b> | <b>95% CI<br/>Lower</b> | <b>95% CI<br/>Higher</b> | <b>N</b> |
|---------------------|-----------|----------------|-------------------------|--------------------------|----------|
| <b>OS</b>           |           |                |                         |                          |          |
| <b>N-N</b>          | 1,171     | 0,0028         | 1,056                   | 1,298                    | 1118     |
| <b>N-P</b>          | 1,053     | 0,7787         | 0,733                   | 1,514                    | 49       |
| <b>P-N</b>          | 0,951     | 0,6687         | 0,755                   | 1,198                    | 161      |
| <b>TRM</b>          |           |                |                         |                          |          |
| <b>N-N</b>          | 1,355     | <.0001         | 1,178                   | 1,558                    | 1105     |
| <b>N-P</b>          | 1,185     | 0,4763         | 0,743                   | 1,888                    | 48       |
| <b>P-N</b>          | 1,028     | 0,8587         | 0,756                   | 1,4                      | 159      |
| <b>DFS</b>          |           |                |                         |                          |          |
| <b>N-N</b>          | 1,12      | 0,0278         | 1,012                   | 1,239                    | 1105     |
| <b>N-P</b>          | 0,976     | 0,8952         | 0,68                    | 1,401                    | 48       |
| <b>P-N</b>          | 0,902     | 0,3717         | 0,719                   | 1,131                    | 159      |
| <b>Relapse</b>      |           |                |                         |                          |          |
| <b>N-N</b>          | 0,922     | 0,2781         | 0,795                   | 1,068                    | 1105     |
| <b>N-P</b>          | 0,726     | 0,2756         | 0,409                   | 1,291                    | 48       |
| <b>P-N</b>          | 0,785     | 0,1536         | 0,563                   | 1,095                    | 159      |
| <b>aGvHD II-IV</b>  |           |                |                         |                          |          |
| <b>N-N</b>          | 1,211     | 0,0021         | 1,072                   | 1,367                    | 1013     |
| <b>N-P</b>          | 1,442     | 0,0741         | 0,965                   | 2,155                    | 45       |
| <b>P-N</b>          | 1,533     | 0,0003         | 1,217                   | 1,933                    | 147      |
| <b>aGvHD III-IV</b> |           |                |                         |                          |          |
| <b>N-N</b>          | 1,051     | 0,6106         | 0,868                   | 1,273                    | 1016     |
| <b>N-P</b>          | 1,582     | 0,1098         | 0,902                   | 2,776                    | 45       |
| <b>P-N</b>          | 1,01      | 0,9594         | 0,677                   | 1,507                    | 147      |
| <b>cGvHD</b>        |           |                |                         |                          |          |
| <b>N-N</b>          | 1,211     | 0,0013         | 1,077                   | 1,362                    | 1072     |
| <b>N-P</b>          | 1,087     | 0,6925         | 0,72                    | 1,64                     | 45       |
| <b>P-N</b>          | 1,22      | 0,0881         | 0,971                   | 1,534                    | 159      |

Data are shown using concordantly permissive mismatches as reference (N= 1402). HR: hazard ratio; N-N: concordantly non-permissive mismatches; N-P: non-permissive by TCE-X but permissive by TCE-FD; P-N: permissive by TCE-X but non-permissive by TCE-FD.

**Supplementary Table S3.** Multivariable regression models for association between dFD DPB1 mismatches and clinical outcome.

|                     | <b>dFD&gt;2.665 High Risk</b> |         | <b>dFD&gt;1.64 High Risk</b> |         |
|---------------------|-------------------------------|---------|------------------------------|---------|
|                     | <b>N=827 &gt;2.665</b>        |         | <b>N=1296 &gt;1.64</b>       |         |
|                     | <b>N=1903 ≤2.665</b>          |         | <b>N=1434 ≤1.64</b>          |         |
|                     | HR (95% CI)                   | p-value | HR (95% CI)                  | p-value |
| <b>OS</b>           | 1.10 (0.99-1.23)              | 0.074   | 1.16 (1.01-1.27)             | 0.003   |
| <b>DFS</b>          | 1.09 (0.98-1.21)              | 0.099   | 1.12 (1.02-1.24)             | 0.019   |
| <b>TRM</b>          | 1.19 (1.03-1.37)              | 0.019   | 1.24 (1.08-1.41)             | 0.002   |
| <b>Relapse</b>      | 1.01 (0.87-1.18)              | 0.854   | 1.03 (0.89-1.18)             | 0.691   |
| <b>cGVHD</b>        | 1.11 (0.99-1.26)              | 0.079   | 1.09 (0.98-1.22)             | 0.144   |
| <b>aGVHD II-IV</b>  | 1.08 (0.95-1.22)              | 0.255   | 1.13 (1.01-1.27)             | 0.038   |
| <b>aGVHD III-IV</b> | 1.07 (0.88-1.30)              | 0.499   | 1.02 (0.89-1.22)             | 0.872   |

Data are shown using Low Risk mismatches as reference (N= for dFD >2.665 and N= for dFD >1.64). HR, hazard ratio.

### References:

1. Sanchez-Mazas A, Nunes JM, Middleton D, et al. Common and well-documented HLA alleles over all of Europe and within European sub-regions: A catalogue from the European Federation for Immunogenetics. *HLA*. 2017;89(2):104-113.
2. Mack SJ, Cano P, Hollenbach JA, et al. Common and well-documented HLA alleles: 2012 update to the CWD catalogue. *Tissue Antigens*. 2013;81(4):194-203.
